# Supplementary material for: Loss of adenomatous polyposis coli function renders intestinal epithelial cells resistant to the cytokine IL-22
Source: PubMed Central journal article supplement (PMC6903767; doi:10.1371/journal.pbio.3000540), 2019-11-26

Fig 3B

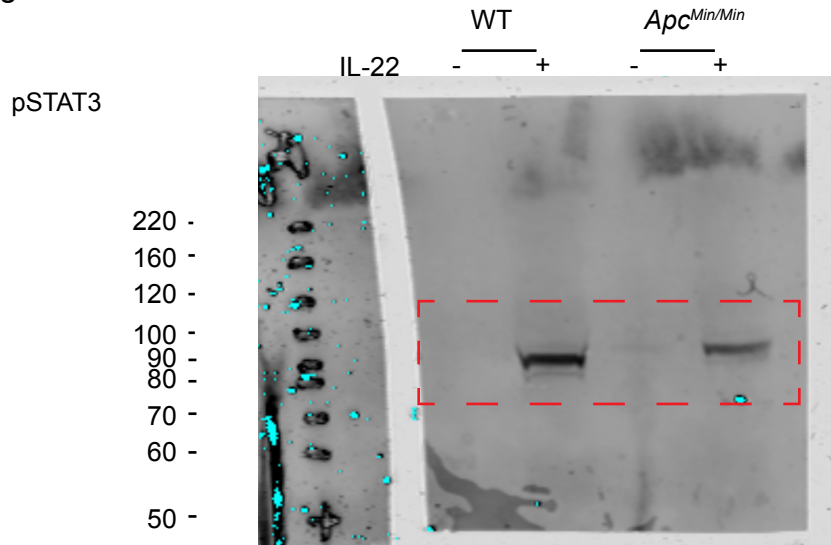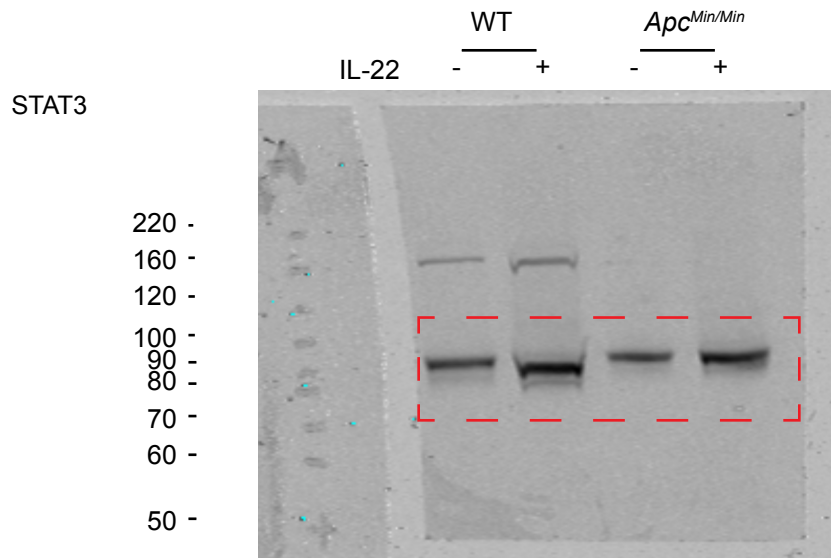

Fig 7A

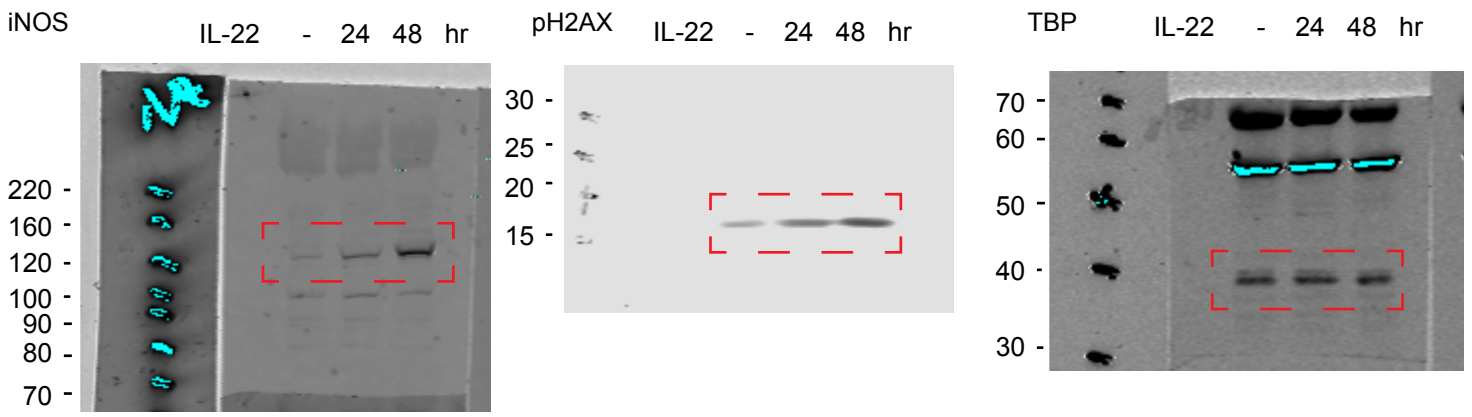

Fig 7B

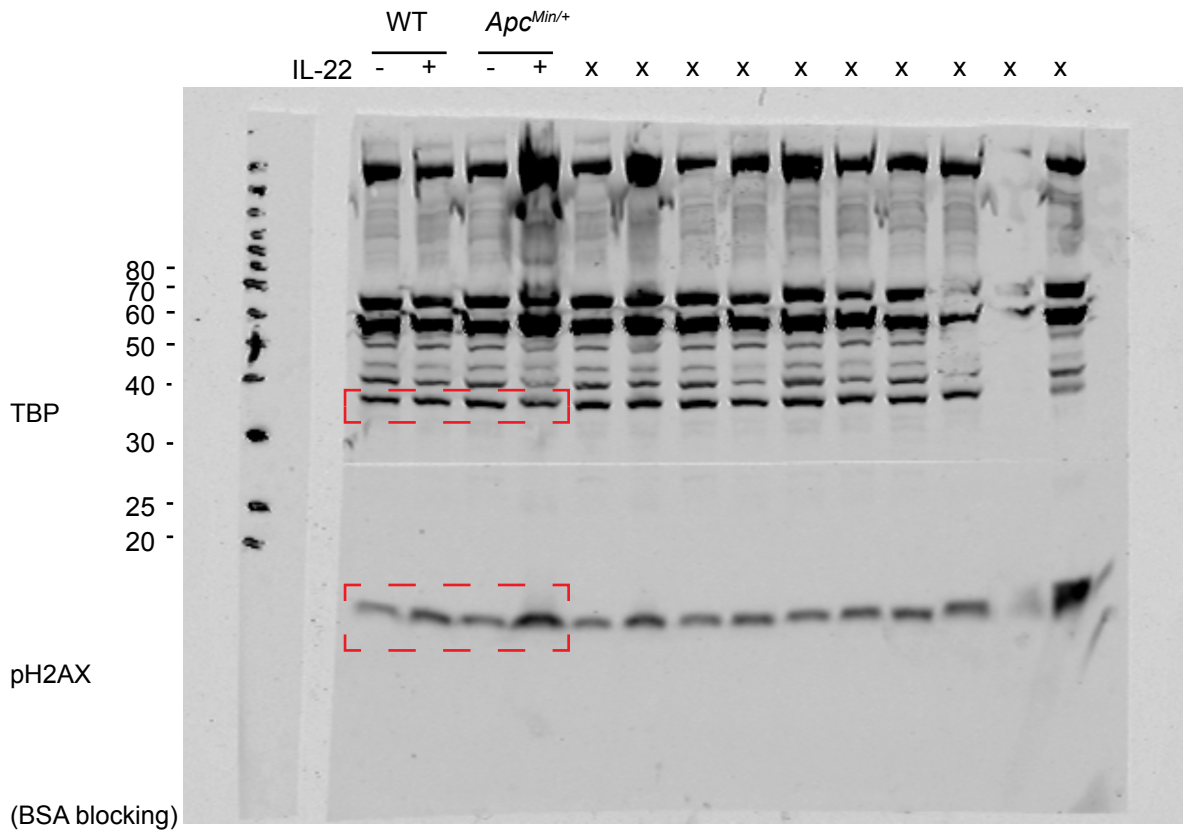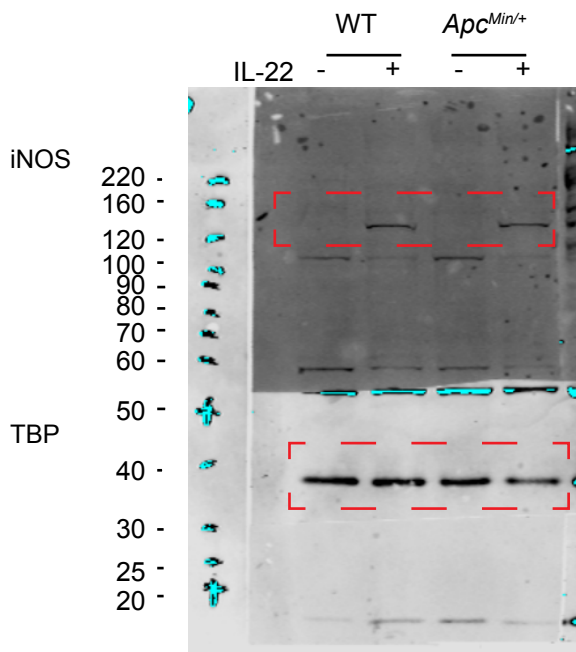

S2B Fig

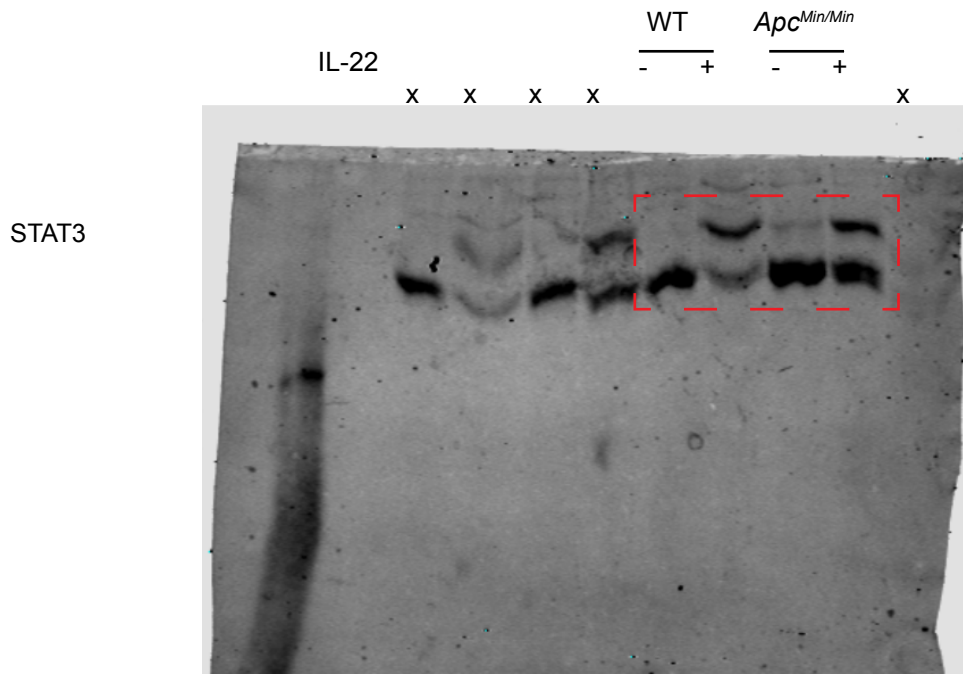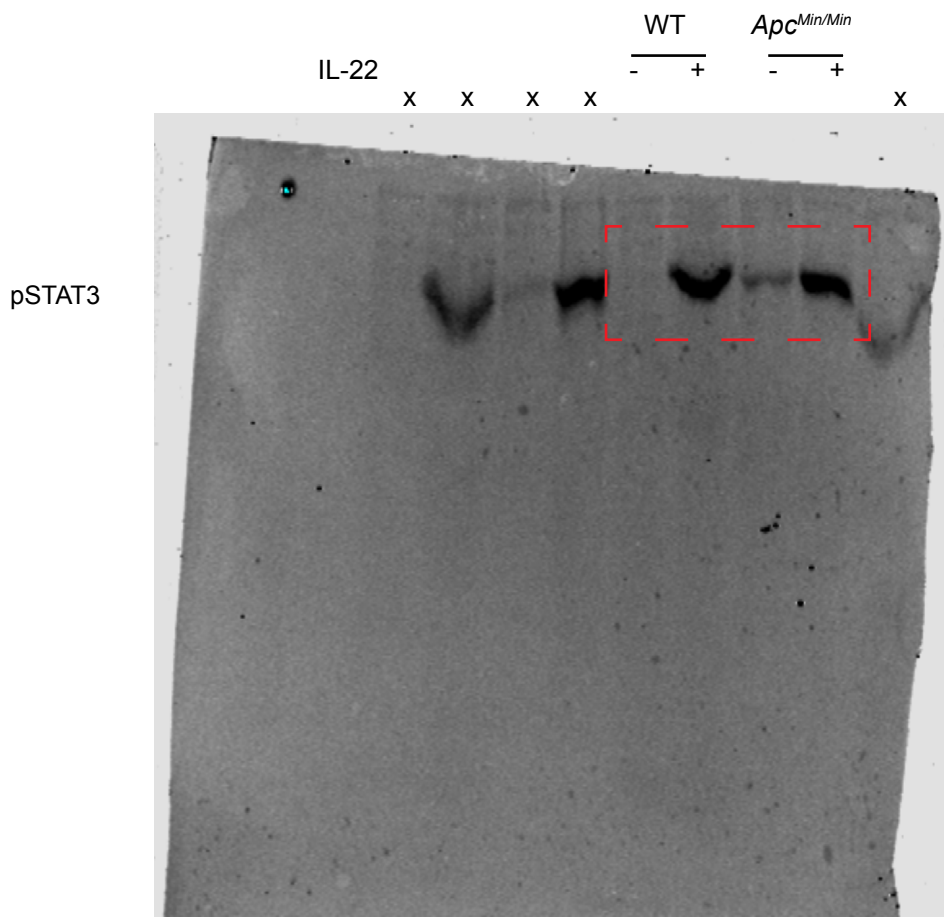

phos-tag gel: molecular weight markers not applicable



S2D Fig

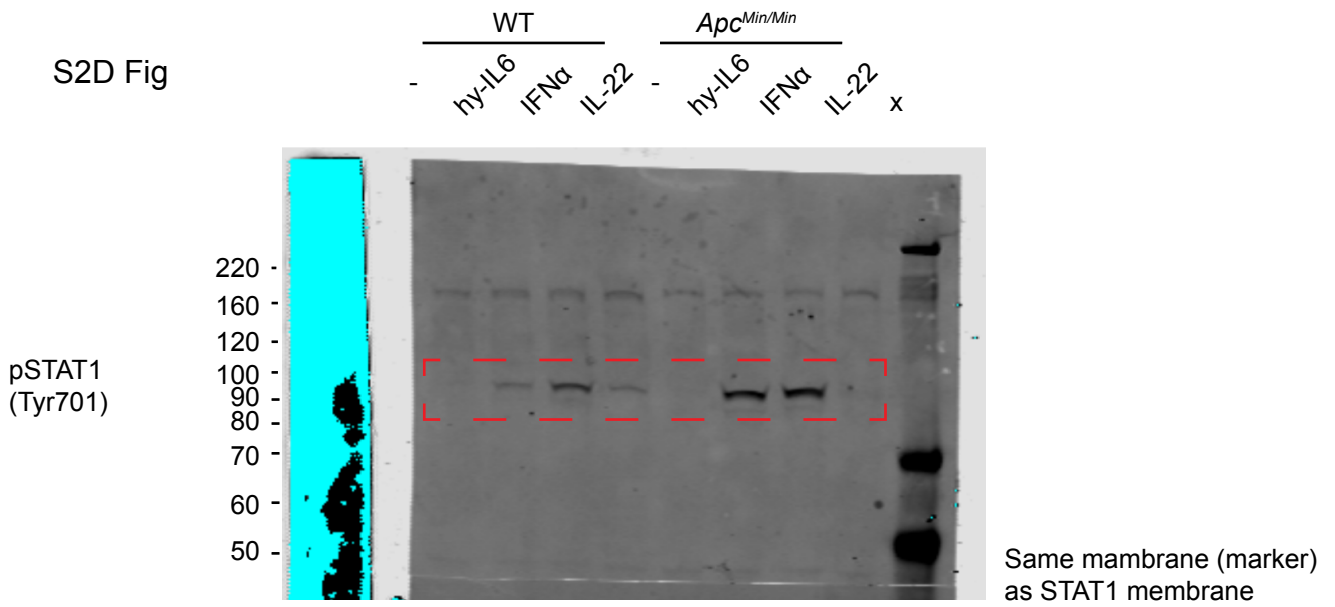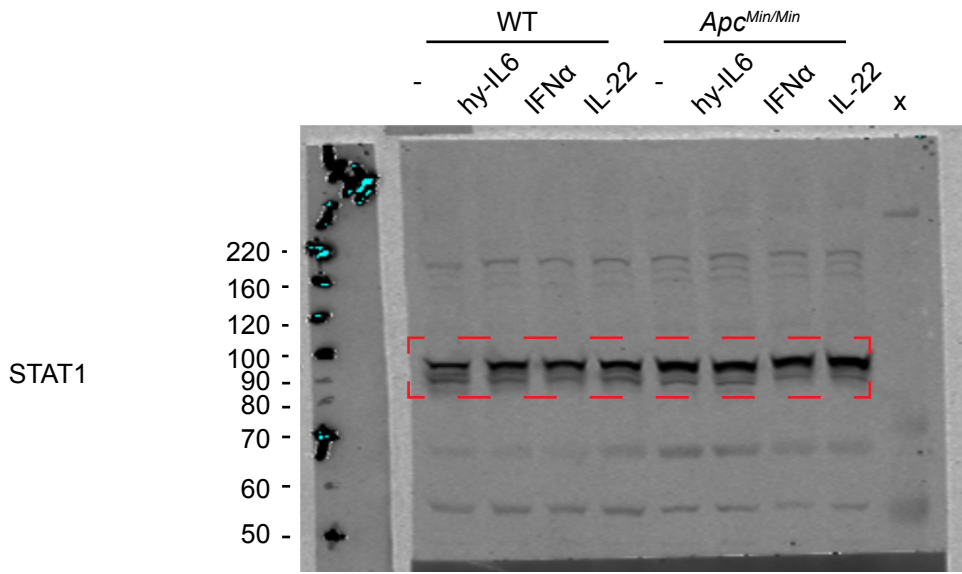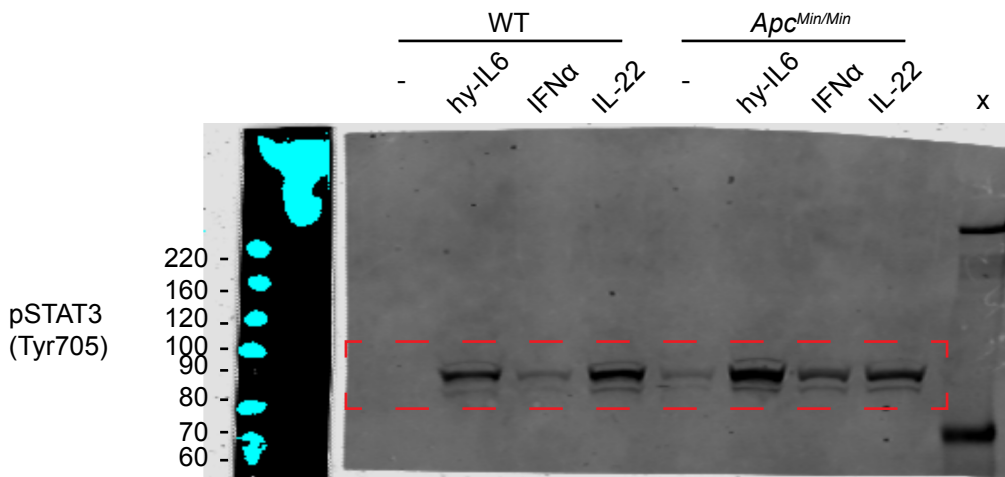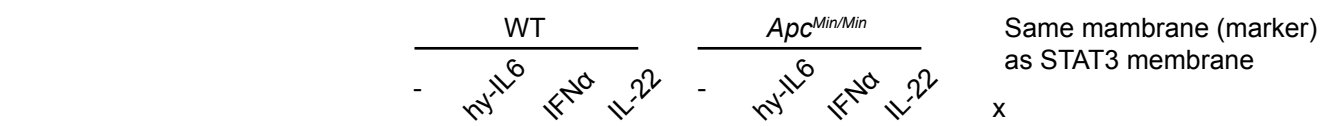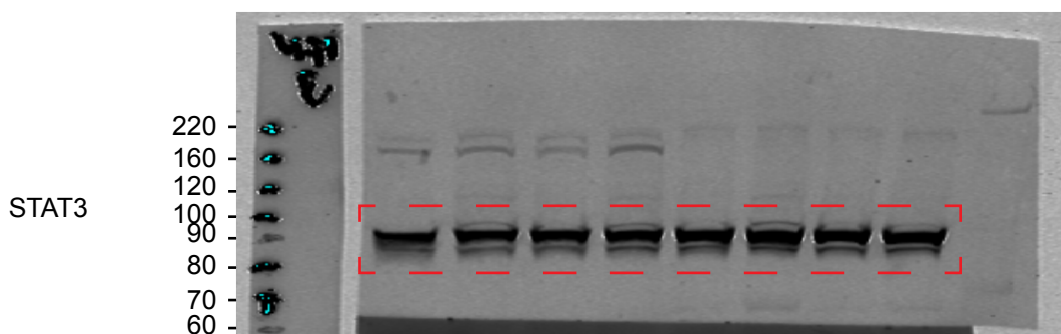

Supplement: pbio.3000540.s011.pdf [file pbio.3000540.s011.pdf]
